# Supplementary material for: Toll like receptor 4 mediates cell death in a mouse MPTP model of Parkinson disease
Source: PubMed Central journal article supplement — Sci Rep. 2013 Mar 6;3:1393. doi: 10.1038/srep01393 (PMC3589722; doi:10.1038/srep01393), 2013-03-06
Supplement: srep01393-s1.pdf [file srep01393-s1.pdf]

## **Supplementary Figure**

### **Toll like receptor 4 mediates cell death in a mouse MPTP model of Parkinson disease**

Carmen Noelker, Lydie Morel, Thomas Lescot, Anke Osterloh, Daniel Alvarez-Fischer, Minka Breloer, Carmen Henze, Candan Depboylu, Delphine Skrzydelski, Patrick P. Michel, Richard C. Dodel, Lixia Lu, Etienne C. Hirsch, Stéphane Hunot, and Andreas Hartmann

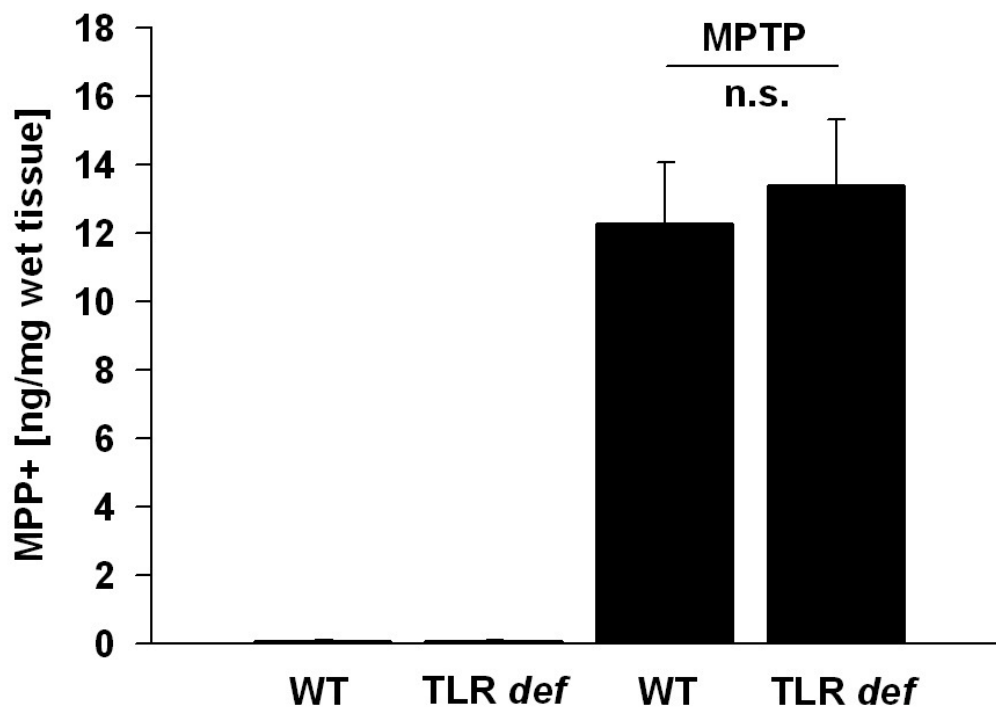

### Supplemental Figure 1

HPLC measurement of striatal 1-methyl-4-phenylpyridinium (MPP<sup>+</sup>) content after a single systemic MPTP injection in TLR4-deficient (TLR *def*) and WT mice. Values are expressed as mean  $\pm$  SEM, n.s = no statistical significance.
